# Supplementary material for: Mechanical compaction mechanisms in the input sediments of the Sumatra subduction complex – insights from microstructural analysis of cores from IODP Expedition 362
Source: Copernicus journal article supplement (doi:10.5194/se-13-1513-2022), 2022-10-10
Supplement: Supplementary file 1 [file Figure S1.pdf › Figure S1.pdf]

a)

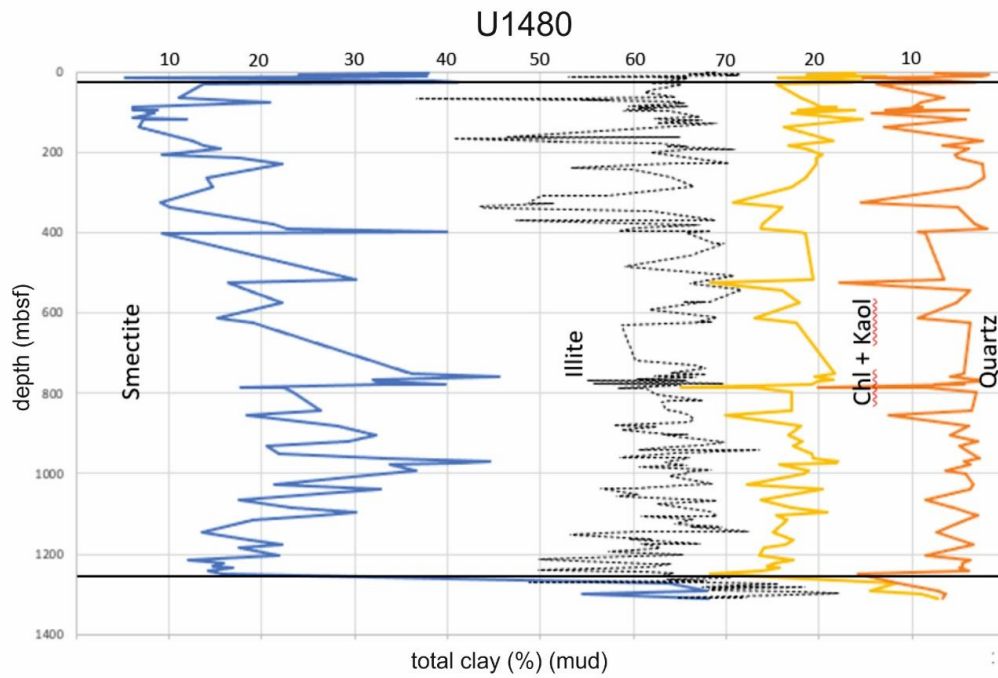

b)

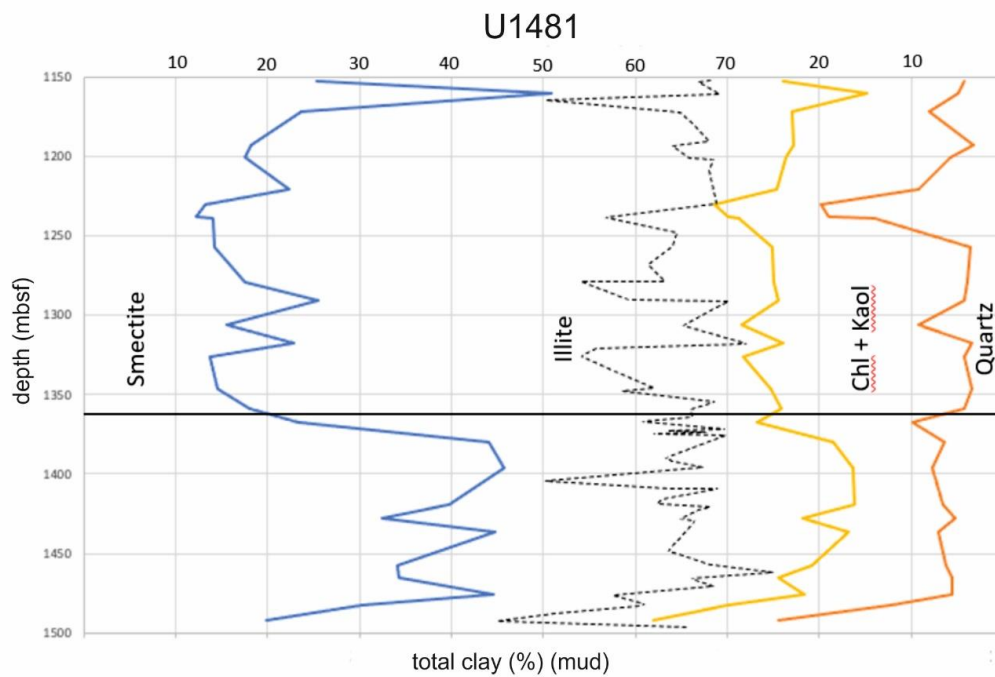

**Figure S1:** Clay mineral from clay (<2mm) separates, reported by Rosenberger et al., (2020) for U1480 and U1481 drill holes respectively in (a) and (b). Solid horizontal lines in (a) indicate base of Unit-I (Upper line) and base of Unit-II (Lower line) encountered at U1480 drilling site. Solid horizontal in (b) indicates base of Unit-II encountered at U1481 drilling site. Heating experiments (Rosenberger et al., 2020) indicate chlorite accounts for 66-100% Chl+Kaol fraction.
