# Supplementary material for: Mechanical compaction mechanisms in the input sediments of the Sumatra subduction complex – insights from microstructural analysis of cores from IODP Expedition 362
Source: Copernicus journal article supplement (doi:10.5194/se-13-1513-2022), 2022-10-10
Supplement: Supplementary file [file se-13-1513-2022-supplement-title-page.pdf › se-13-1513-2022-supplement-title-page.pdf]

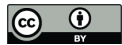

## *Supplement of*

# **Mechanical compaction mechanisms in the input sediments of the Sumatra subduction complex – insights from microstructural analysis of cores from IODP Expedition 362**

**Sivaji Lahiri et al.**

*Correspondence to:* Sivaji Lahiri ([sivaji.lahiri2@gmail.com](mailto:sivaji.lahiri2@gmail.com))

- [se-13-1513-2022-supplement-title-page.pdf](#)
- [Document S1.docx](#)
- [Document S2.docx](#)
- [Figure S1.pdf](#)
- [Figure S10.pdf](#)
- [Figure S11.pdf](#)
- [Figure S12.pdf](#)
- [Figure S2.pdf](#)
- [Figure S3.pdf](#)
- [Figure S4.pdf](#)
- [Figure S5.pdf](#)
- [Figure S6.pdf](#)
- [Figure S7.pdf](#)
- [Figure S8.pdf](#)
- [Figure S9.pdf](#)
- [Table S1.docx](#)
- [Table S2.xlsx](#)
- [Table S3.docx](#)
- [Table S4.docx](#)

The copyright of individual parts of the supplement might differ from the article licence.
